# Supplementary material for: Horseradish peroxidase-catalyzed polyacrylamide gels: monitoring their polymerization with BSA-stabilized gold nanoclusters and their functional validation in electrophoresis
Source: Royal Society of Chemistry journal article supplement (doi:10.1039/d3ra07208h), 2024-01-01
Supplement: d3ra07208h3.pdf [file d3ra07208h3.pdf]

**Supporting Information**

**Horseradish peroxidase-catalyzed polyacrylamide gels:  
monitoring their polymerization with BSA-stabilized gold  
nanoclusters and their functional validation in electrophoresis**

**Chang Liao<sup>1#</sup>, Tao Li<sup>1#</sup>, Fengjiao Chen<sup>2</sup>, Shaoying Yan<sup>3</sup>, Liying Zhu<sup>4</sup>, Hua Tang<sup>1\*</sup>,  
Dan Wang<sup>5\*</sup>**

- 1. Key Laboratory of Molecular Biology for Infectious Diseases (Ministry of Education),  
Chongqing Medical University, Chongqing 400016, China.*
- 2. Guangshan County People's Hospital, Xinyang 465450, China.*
- 3. Department of Clinical Laboratory, The First Affiliated Hospital of Nanchang University,  
Nanchang, Jiangxi 330000, China*
- 4. Center for Clinical Laboratories, Affiliated Hospital of Guizhou Medical University, Guiyang  
550004, China*
- 5. Post-Doctoral Research Center, The People's Hospital of Rongchang District, Chongqing  
402460, China.*

**# Chang Liao and Tao Li have contributed equally to this work.**

**\*Correspondence Hua Tang and Dan Wang.**

**E-mail: tanghua86162003@cqmu.edu.cn or cqwangdan61@163.com.**

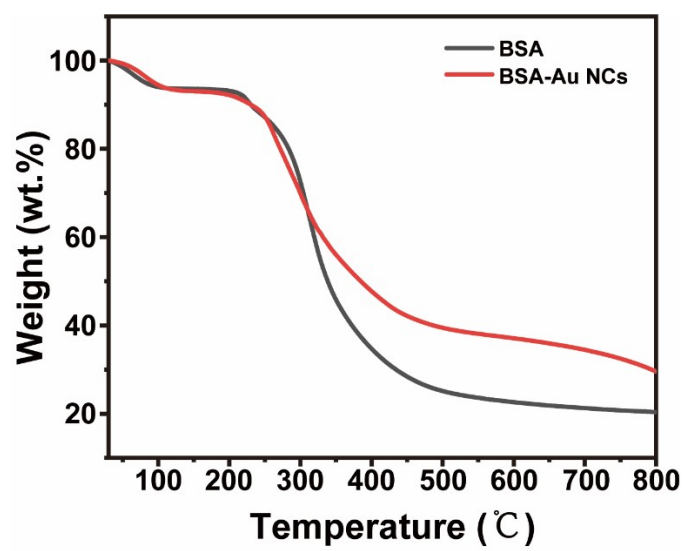

**Figure S1.** TGA curves of BSA and BSA-Au NCs

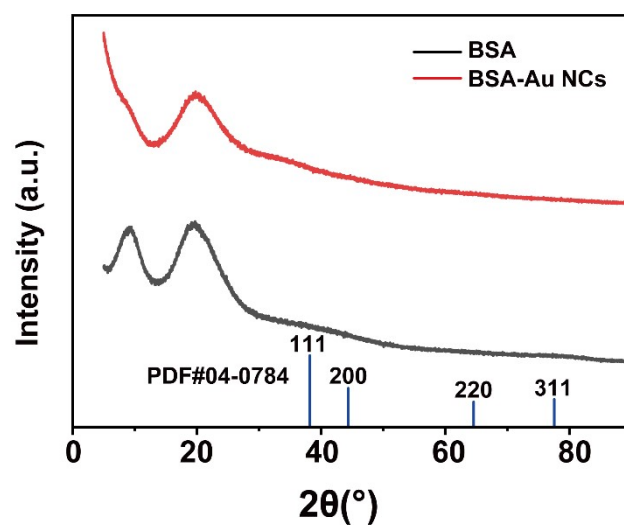

**Figure S2.** XRD spectrum of BSA and BSA-Au NCs.

before after

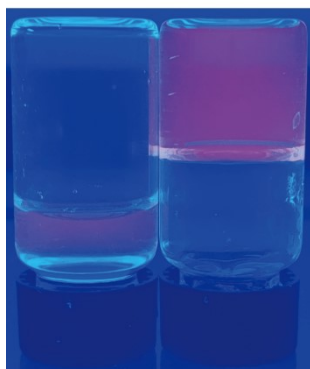

30

31 **Figure S3.** Photographic images of polyacrylamide gel catalyzed by HRP/H<sub>2</sub>O<sub>2</sub>/ACAC, taken  
32 before and after polymerization under UV light (365 nm).

33

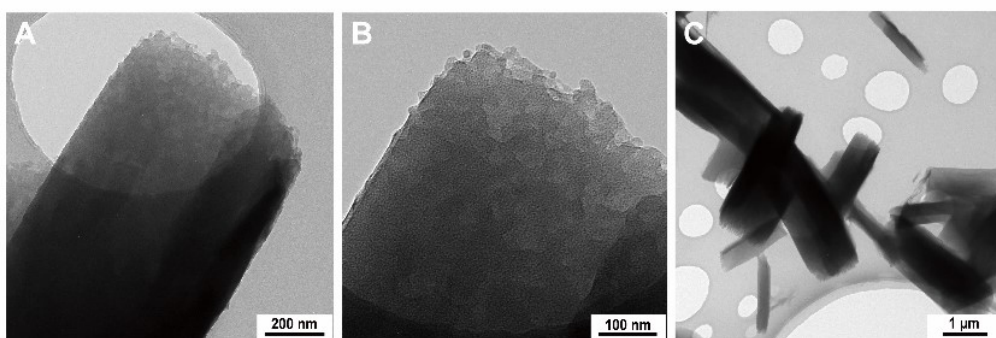

34 **Figure S4.** HRTEM images of BSA-Au NCs in polyacrylamide gels with different magnifications.

35

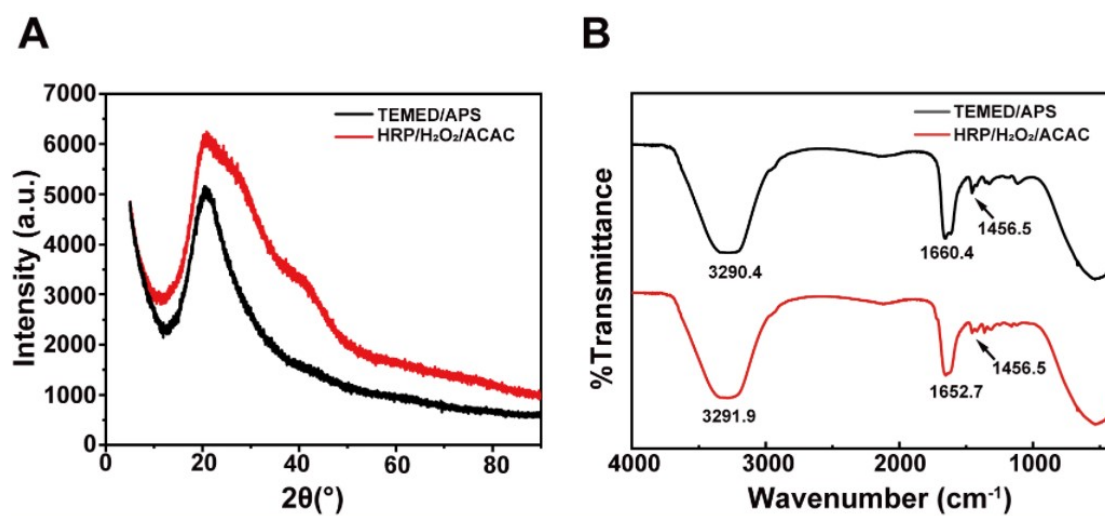

36

37 **Figure S5.** (A) XRD spectrum and (B) FT-IR spectrum of polyacrylamide gels catalyzed by  
38 TEMED/APS and HRP/H<sub>2</sub>O<sub>2</sub>/ACAC.

39

40

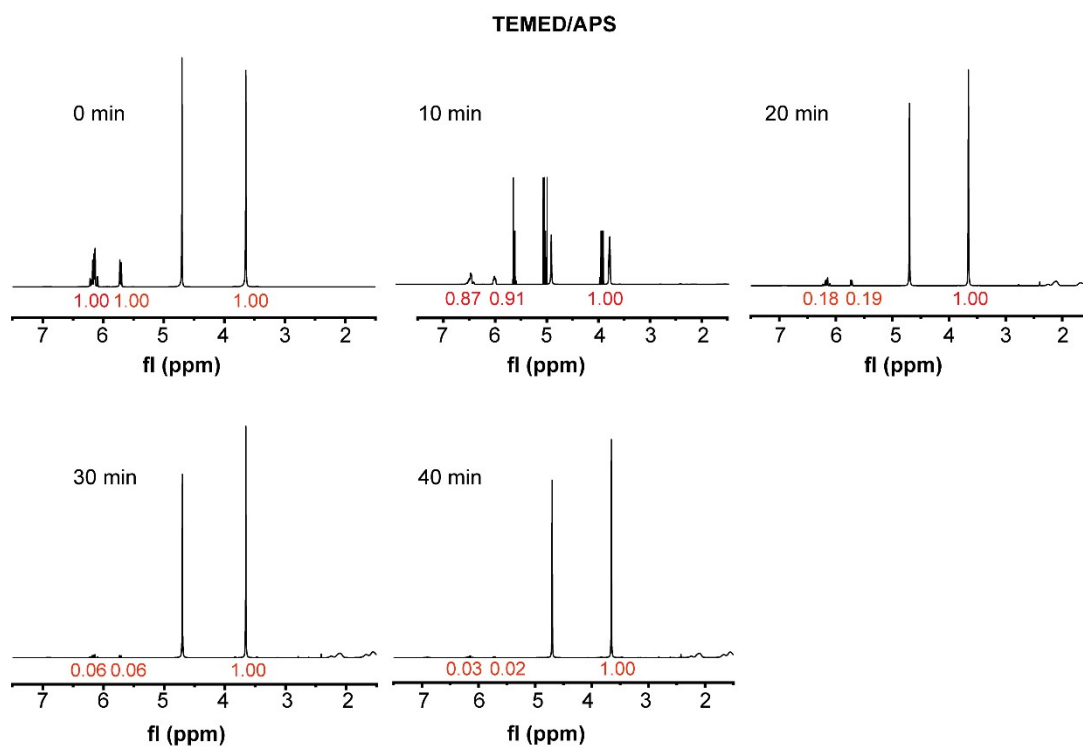

41  
 42 **Figure S6.**  $^1\text{H}$ -NMR spectrum of TEMED/APS-catalyzed polyacrylamide gels at different  
 43 points in time.

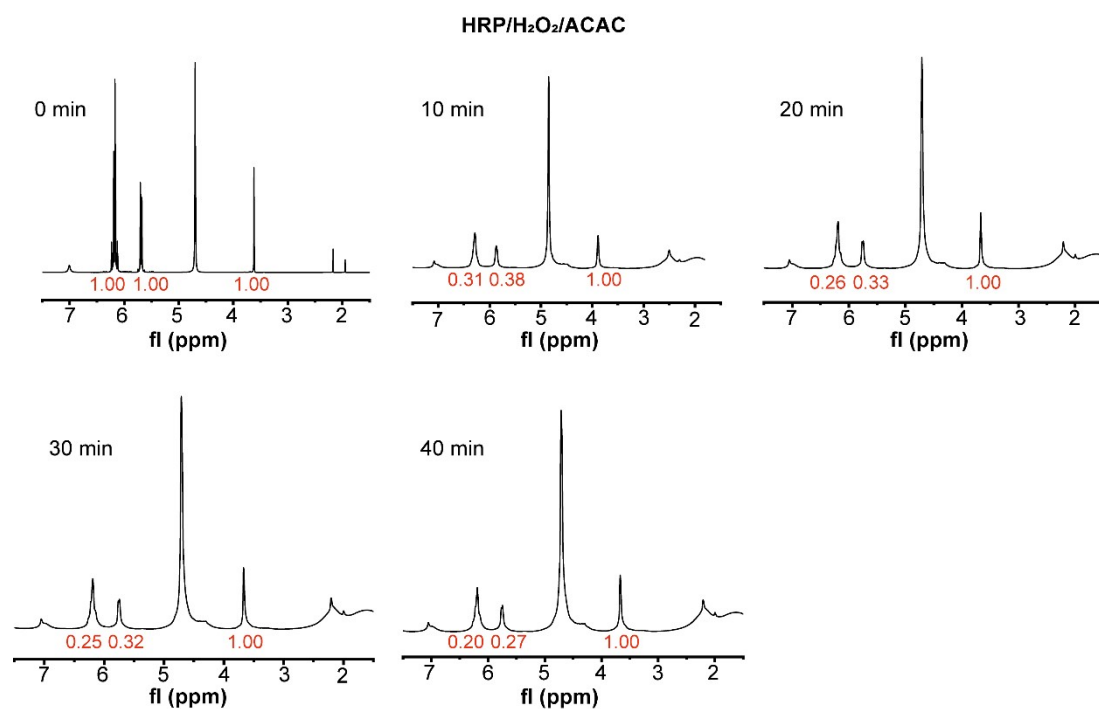

44  
45 **Figure S7.** <sup>1</sup>H-NMR spectrum of HRP/H<sub>2</sub>O<sub>2</sub>/ACAC-catalyzed polyacrylamide gels at different  
46 points in time.
